# Supplementary material for: Formation of divalent ion mediated anionic disc bicelle–DNA complexes
Source: Royal Society of Chemistry journal article supplement (doi:10.1039/c3sm52775a), 2013-12-23
Supplement: c3sm52775a1.pdf [file c3sm52775a1.pdf]

## Electronic Supplementary Information (ESI)

### Formation of divalent ion mediated anionic disc bicelle-DNA complexes

Po-Wei Yang,<sup>1</sup> Tsang-Lang Lin,<sup>1\*</sup> Yuan Hu,<sup>1</sup> U-Ser Jeng<sup>2</sup>

<sup>1</sup> Department of Engineering and System Science, National Tsing Hua University, Hsinchu, Taiwan, R.O.C.

<sup>2</sup> National Synchrotron Radiation Research Center (NSRRC), Hsinchu, Taiwan, R.O.C.

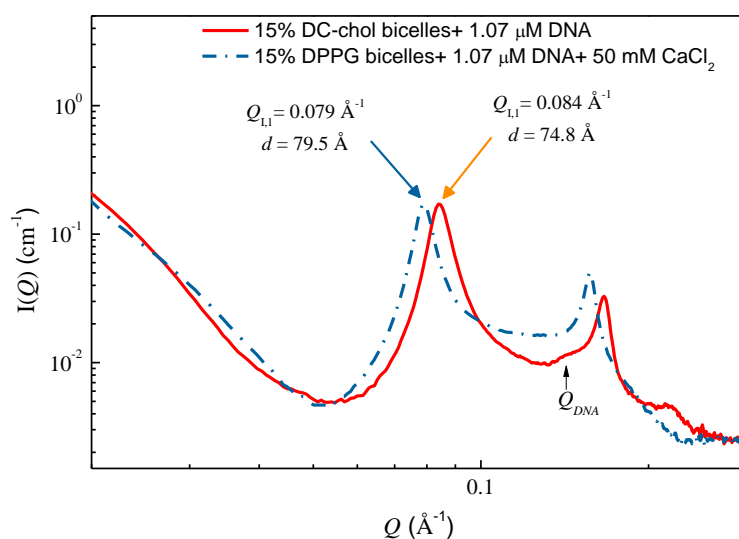

Fig. S1. The measured small-angle X-ray scattering profiles of cationic (DC-cholesterol) bicelle-DNA complexes and the anionic (DPPG) bicelles-DNA complexes at 50 mM calcium ions. The  $d$ -spacing of AB-DNA complexes is found to be slightly larger than the CB-DNA complexes by 4.7 Å.

The first diffraction peaks were fitted by non-linear least square method with a Lorentz function to model the diffraction peaks. The fitted results of the first diffraction peaks are listed here.

|                                                    | Peak position<br>(1/Å) | FWHM<br>(1/Å)   | Peak height<br>(1/cm) | $d$ -spacing<br>(Å) |
|----------------------------------------------------|------------------------|-----------------|-----------------------|---------------------|
| 15% DC-chol<br>bicelle/DNA                         | 0.084±0.00003          | 0.00760±0.00009 | 0.160                 | 74.8±0.03           |
| 15% DPPG<br>bicelle/DNA/50 mM<br>CaCl <sub>2</sub> | 0.079±0.00002          | 0.00647±0.00007 | 0.156                 | 79.5±0.02           |
